# Supplementary material
Source: Springer Nature journal article supplement (https://www.springermedizin.de/resource/supplementary/13031_2009_35_MOESM3_ESM.pdf/9644980)

# Traumatic Events experienced most in the past year

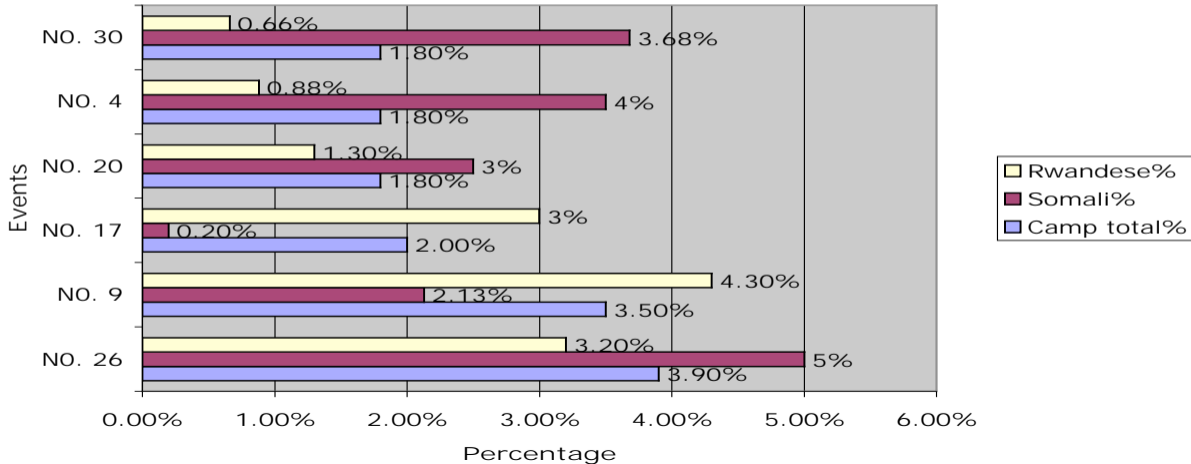

Supplement: MOESM3 [file 9644980]
